# Supplementary material for: A white-box approach to microarray probe response characterization: the BaFL pipeline
Source: Springer Nature journal article supplement (doi:10.1186/1471-2105-10-449), 2009-12-01

A

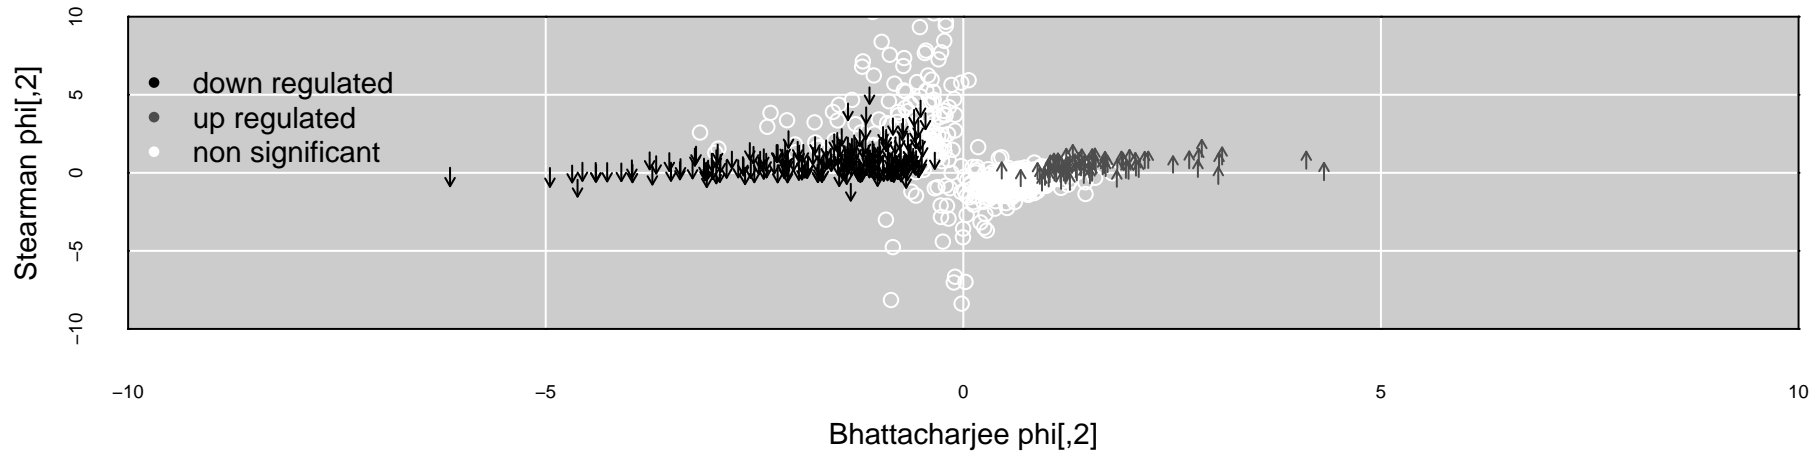

B

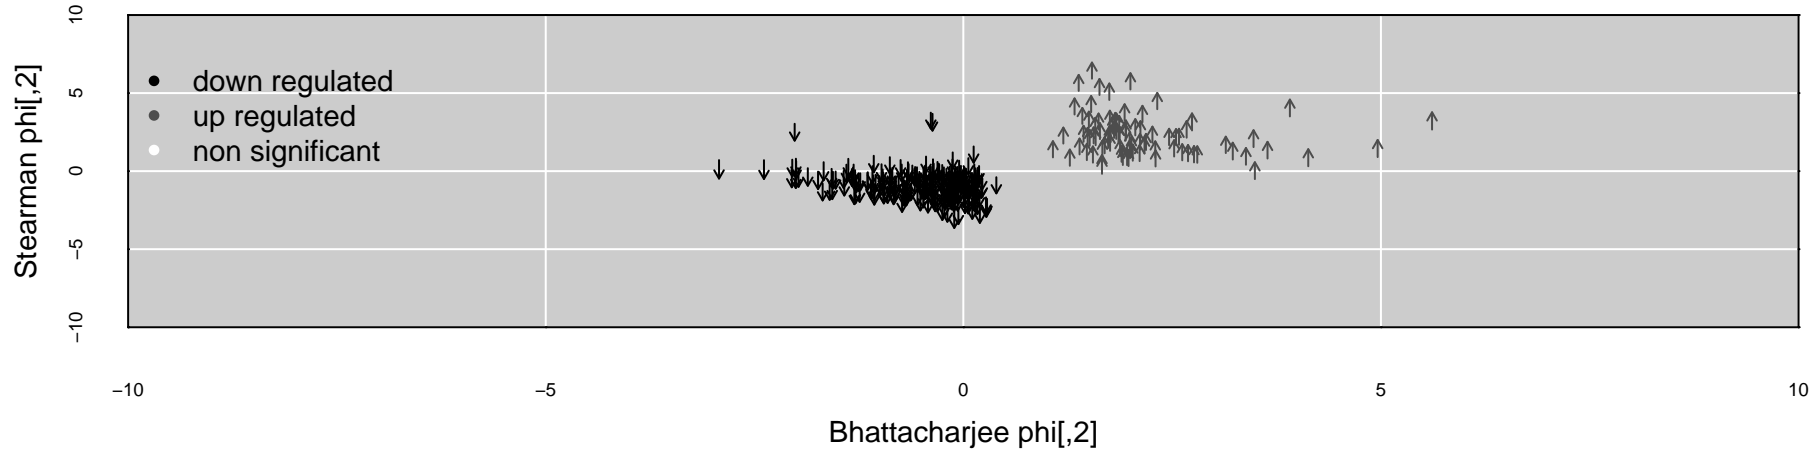

Supplement: 12859_2009_3179_MOESM10_ESM.pdf [file 12859_2009_3179_MOESM10_ESM.pdf]
